# Supplementary material
Source: Springer Nature journal article supplement (https://www.springermedizin.de/resource/supplementary/12880_2005_16_MOESM5_ESM.pdf/9450366)

Funnel plot with pseudo 95% confidence limits

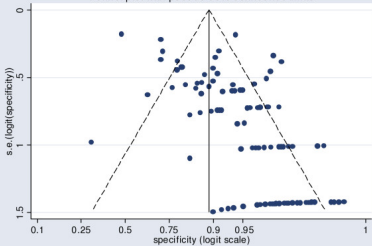

Supplement: MOESM5 [file 9450366]
